# Supplementary material
Source: MDPI journal article supplement (https://www.mdpi.com/2073-4344/12/6/637)
Supplement: s1 [file s1]

Archive with 1 entries (1 files):
- catalysts-1743460-supplementary.pdf
